# Supplementary material for: A thermo-sensitive supramolecular hydrogel derived from an onium salt with solution–gel–crystal transition properties
Source: Royal Society of Chemistry journal article supplement (doi:10.1039/c6ra23761d), 2016-01-01
Supplement: c6ra23761d1.pdf [file c6ra23761d1.pdf]

## Electronic Supplementary Information (ESI)

### A thermo-sensitive supramolecular hydrogel derived from an onium salt with the property of solution-gel-crystal transition

Xin-Jian Jia,<sup>a</sup> Jinshu Wang,<sup>\*a</sup> Di-Chang Zhong,<sup>b</sup> Junshu Wu,<sup>a</sup> Bingxin Zhao,<sup>a</sup> Daniel den Engelsen<sup>a</sup> and Xu-Zhong Luo<sup>\*b</sup>

<sup>a</sup> Key Laboratory of Advanced Functional Materials for Ministry of Education, College of Materials Science and Engineering, Beijing University of Technology, Beijing 100124, China. E-mail: wangjsh@bjut.edu.cn

<sup>b</sup> Key Laboratory of Organo-Pharmaceutical Chemistry of Jiangxi Province, Key Laboratory of Jiangxi University for Functional Material Chemistry, Gannan Normal University, Ganzhou 341000, China. E-mail: luoxuzhong@hotmail.com

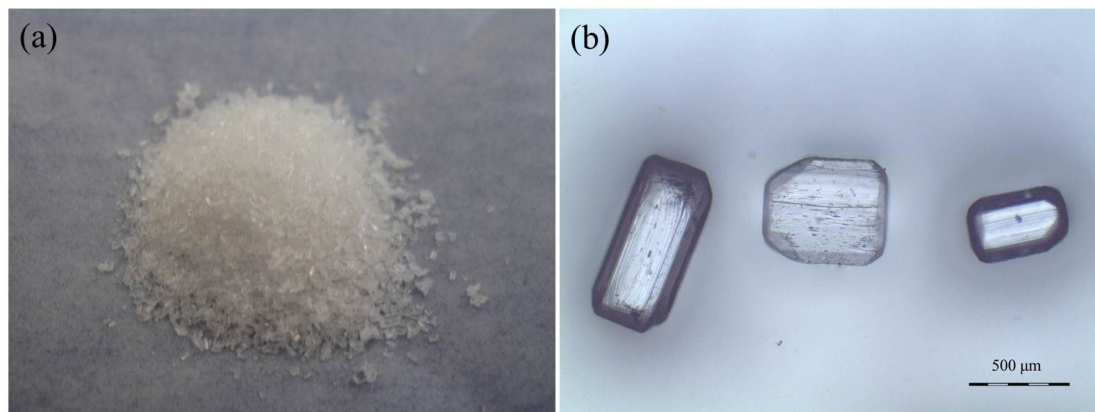

**Fig. S1.** (a) Photograph and (b) micrograph of the TTIBD crystals.

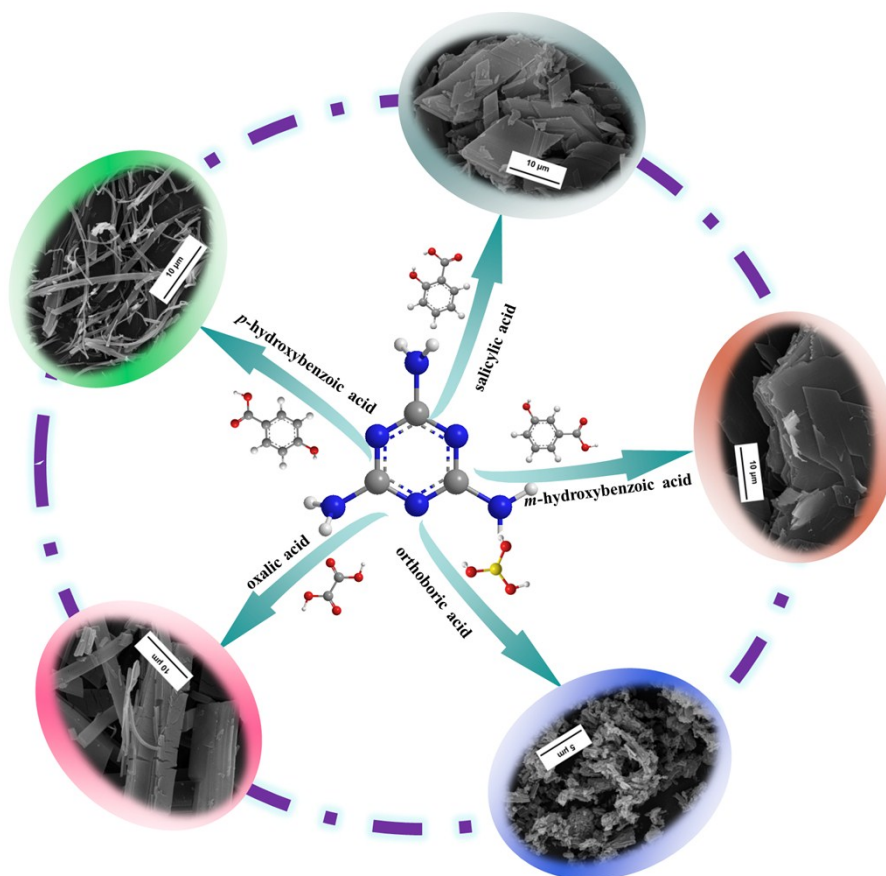

**Fig. S2.** Morphology of the xerogels formed from melamine with salicylic acid, *p*-hydroxybenzoic acid, *m*-hydroxybenzoic acid, orthoboric acid and oxalic acid.

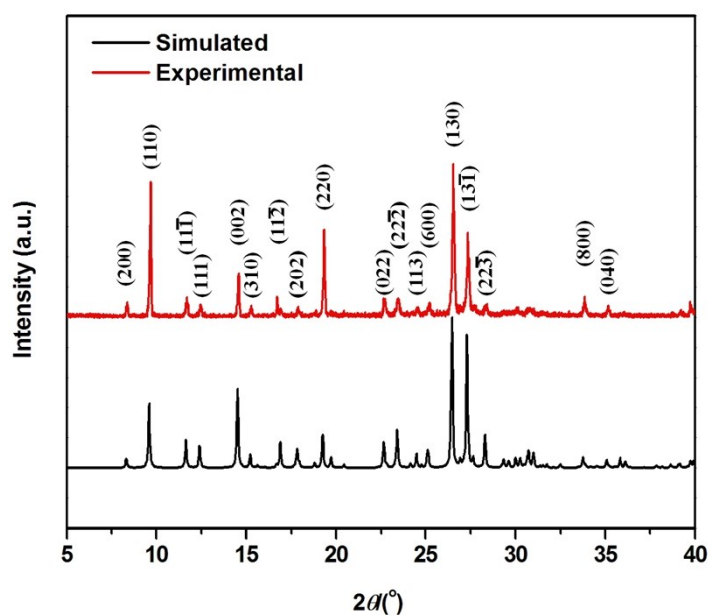

**Fig. S3.** Simulated and experimental PXRD patterns for the TTIBD crystals.

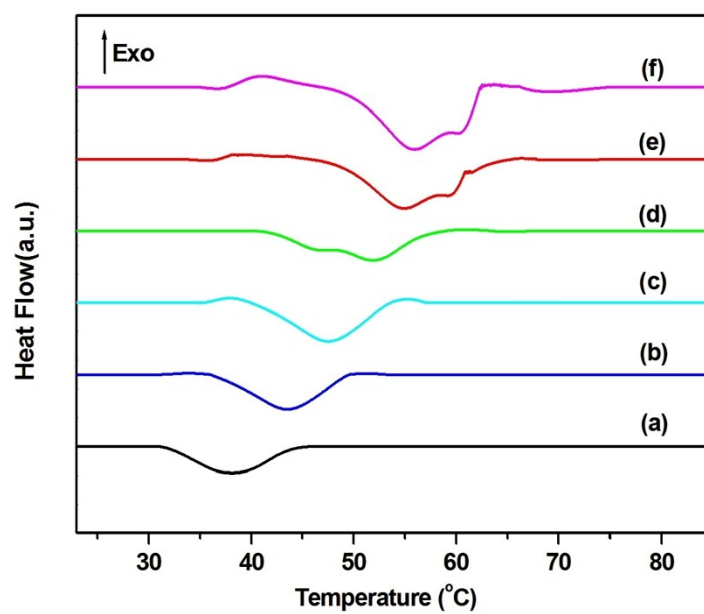

**Fig. S4.** DSC thermograms of the TTIBD hydrogels formed at different gelator concentrations: (a)  $0.06 \text{ mol}\cdot\text{L}^{-1}$ , (b)  $0.08 \text{ mol}\cdot\text{L}^{-1}$ , (c)  $0.10 \text{ mol}\cdot\text{L}^{-1}$ , (d)  $0.12 \text{ mol}\cdot\text{L}^{-1}$ , (e)  $0.14 \text{ mol}\cdot\text{L}^{-1}$  and (f)  $0.16 \text{ mol}\cdot\text{L}^{-1}$ .

**Table S1.** Crystal data and structure refinement for TTIBD.

| Compound                                                                    | TTIBD                                                         |
|-----------------------------------------------------------------------------|---------------------------------------------------------------|
| Formula                                                                     | C <sub>10</sub> H <sub>16</sub> N <sub>6</sub> O <sub>4</sub> |
| F.W.                                                                        | 284.29                                                        |
| <i>T</i> (K)                                                                | 298 (2)                                                       |
| Crystal system                                                              | Monoclinic                                                    |
| Space group                                                                 | <i>C2/c</i>                                                   |
| <i>a</i> (Å)                                                                | 21.477 (3)                                                    |
| <i>b</i> (Å)                                                                | 10.2253 (14)                                                  |
| <i>c</i> (Å)                                                                | 12.3312 (17)                                                  |
| $\beta$ (°)                                                                 | 98.717 (3)                                                    |
| <i>V</i> (Å <sup>3</sup> )                                                  | 2676.8 (6)                                                    |
| <i>Z</i>                                                                    | 8                                                             |
| <i>D<sub>c</sub></i> (g cm <sup>-3</sup> )                                  | 1.411                                                         |
| $\mu$ (mm <sup>-1</sup> )                                                   | 0.111                                                         |
| Data collected/uniq. ( <i>R</i> <sub>int</sub> )                            | 7250/2351 (0.0249)                                            |
| <i>R</i> <sub>1</sub> , <i>wR</i> <sub>2</sub> [ <i>I</i> > 2σ( <i>I</i> )] | 0.0393, 0.1096                                                |
| <i>R</i> <sub>1</sub> , <i>wR</i> <sub>2</sub> (all data)                   | 0.0445, 0.1158                                                |
| GOF                                                                         | 1.027                                                         |
| Residues (e Å <sup>-3</sup> )                                               | 0.138, -0.235                                                 |

<sup>a</sup>  $R_1 = \frac{\sum ||F_o| - |F_c||}{\sum |F_o|}$ . <sup>b</sup>  $wR_2 = \frac{[\sum [w(F_o^2 - F_c^2)^2]/\sum w(F_o^2)^2]^{1/2}}{w}$ ,  $w = 1/[\sigma^2(F_o)^2 + (aP)^2 + bP]$ , where  $P = [(F_o^2) + 2F_c^2]/3$ .

**Table S2.** Selected bond lengths (Å) and angles (°) for TTIBD.

|          |             |          |             |
|----------|-------------|----------|-------------|
| C1—O1    | 1.2497 (17) | C9—N4    | 1.3149 (17) |
| C1—O2    | 1.2545 (17) | C9—N2    | 1.3245 (17) |
| C1—C2    | 1.5039 (19) | C9—N1    | 1.3519 (17) |
| C2—C7    | 1.377 (2)   | C10—N5   | 1.3211 (17) |
| C2—C3    | 1.379 (2)   | C10—N2   | 1.3501 (17) |
| C3—C4    | 1.388 (2)   | C10—N3   | 1.3512 (17) |
| C3—H3    | 0.9300      | N1—H1    | 0.8600      |
| C4—C5    | 1.359 (2)   | N4—H4A   | 0.8600      |
| C4—H4    | 0.9300      | N4—H4B   | 0.8600      |
| C5—C6    | 1.374 (2)   | N5—H5A   | 0.8600      |
| C5—H5    | 0.9300      | N5—H5B   | 0.8600      |
| C6—C7    | 1.380 (2)   | N6—H6A   | 0.8600      |
| C6—H6    | 0.9300      | N6—H6B   | 0.8600      |
| C7—H7    | 0.9300      | O1W—H1WA | 0.879 (14)  |
| C8—N6    | 1.3137 (18) | O1W—H1WB | 0.880 (14)  |
| C8—N3    | 1.3301 (17) | O2W—H2WA | 0.874 (15)  |
| C8—N1    | 1.3610 (17) | O2W—H2WB | 0.860 (15)  |
| O1—C1—O2 | 123.27 (12) | N3—C8—N1 | 121.38 (12) |
| O1—C1—C2 | 119.10 (12) | N4—C9—N2 | 120.41 (12) |

---

|          |             |               |             |
|----------|-------------|---------------|-------------|
| O2—C1—C2 | 117.57 (12) | N4—C9—N1      | 117.79 (12) |
| C7—C2—C3 | 119.06 (13) | N2—C9—N1      | 121.80 (11) |
| C7—C2—C1 | 120.22 (13) | N5—C10—N2     | 116.76 (12) |
| C3—C2—C1 | 120.71 (13) | N5—C10—N3     | 117.34 (12) |
| C2—C3—C4 | 120.09 (14) | N2—C10—N3     | 125.90 (11) |
| C2—C3—H3 | 120.0       | C9—N1—C8      | 119.46 (11) |
| C4—C3—H3 | 120.0       | C9—N1—H1      | 120.3       |
| C5—C4—C3 | 120.47 (15) | C8—N1—H1      | 120.3       |
| C5—C4—H4 | 119.8       | C9—N2—C10     | 115.73 (11) |
| C3—C4—H4 | 119.8       | C8—N3—C10     | 115.63 (11) |
| C4—C5—C6 | 119.74 (14) | C9—N4—H4A     | 120.0       |
| C4—C5—H5 | 120.1       | C9—N4—H4B     | 120.0       |
| C6—C5—H5 | 120.1       | H4A—N4—H4B    | 120.0       |
| C5—C6—C7 | 120.27 (16) | C10—N5—H5A    | 120.0       |
| C5—C6—H6 | 119.9       | C10—N5—H5B    | 120.0       |
| C7—C6—H6 | 119.9       | H5A—N5—H5B    | 120.0       |
| C2—C7—C6 | 120.34 (15) | C8—N6—H6A     | 120.0       |
| C2—C7—H7 | 119.8       | C8—N6—H6B     | 120.0       |
| C6—C7—H7 | 119.8       | H6A—N6—H6B    | 120.0       |
| N6—C8—N3 | 121.27 (12) | H1WA—O1W—H1WB | 104.2 (14)  |
| N6—C8—N1 | 117.34 (12) | H2WA—O2W—H2WB | 106.2 (16)  |

---
